# Supplementary material
Source: Springer Nature journal article supplement (https://www.springermedizin.de/resource/supplementary/13075_2009_2916_MOESM1_ESM.pdf/9693184)

a

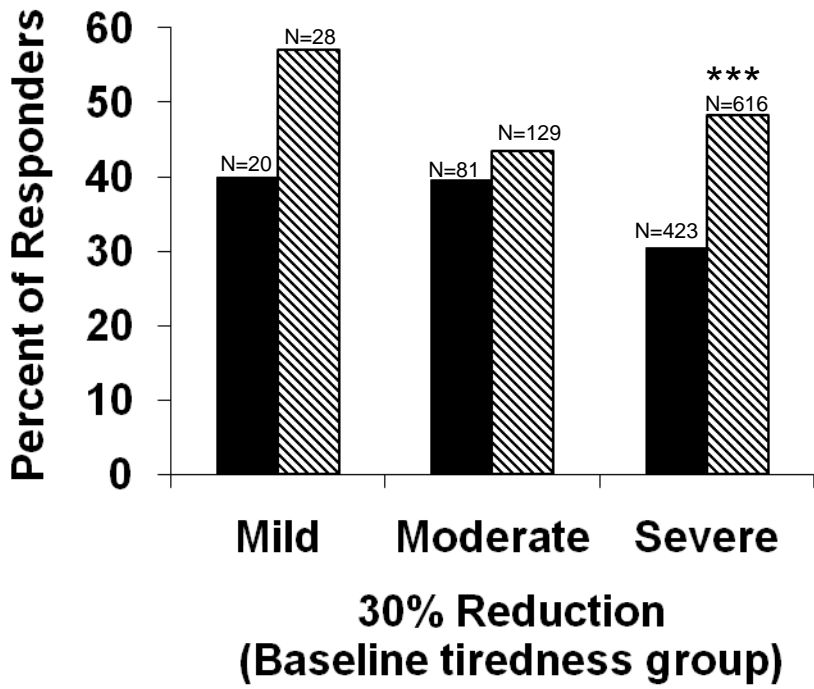

b

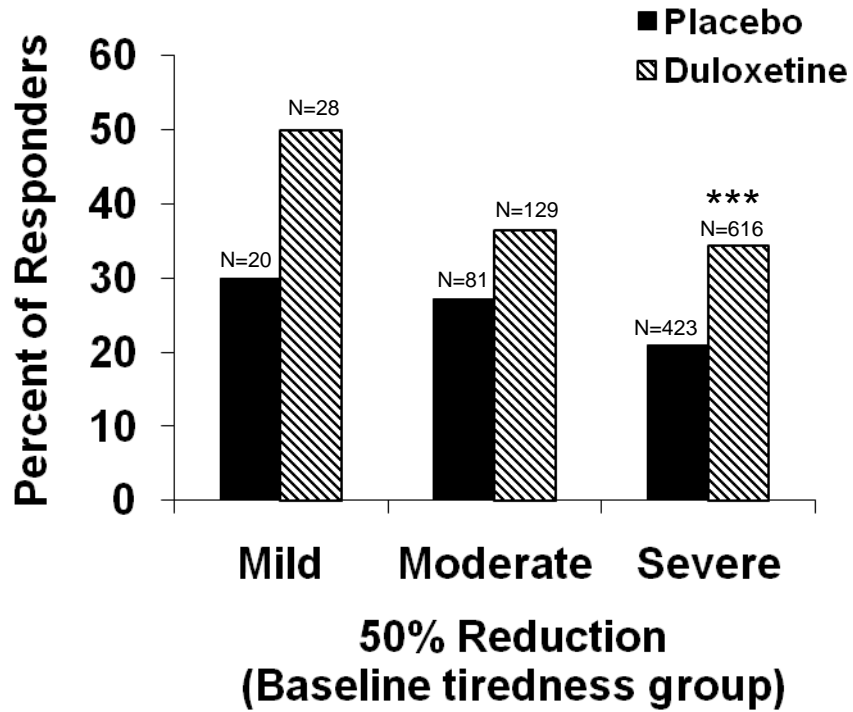

Supplement: MOESM1 [file 9693184]
